# Supplementary material for: Ultrathin Co3O4nanofilm as an efficient bifunctional catalyst for oxygen evolution and reduction reaction in rechargeable zinc–air batteries
Source: Royal Society of Chemistry journal article supplement (doi:10.1039/c7nr02385e), 2017-01-01
Supplement: c7nr02385e1.pdf [file c7nr02385e1.pdf]

Electronic Supplementary Information

## **Ultrathin $\text{Co}_3\text{O}_4$ Nanofilm as an Efficient Bifunctional Catalyst for Oxygen Evolution and Reduction Reaction in Rechargeable Zinc-Air Batteries**

Yu He, Jinfeng Zhang, Guowei He, Xiaopeng Han\*, Xuerong Zheng, Cheng Zhong, Wenbin Hu and Yida Deng\*

Tianjin Key Laboratory of Composite and Functional Materials, Key Laboratory of Advanced Ceramics and Machining Technology (Ministry of Education), and School of Material Science and Engineering, Tianjin University, Tianjin 300072, China.

\*E-mail: [yida.deng@tju.edu.cn](mailto:yida.deng@tju.edu.cn);

\*E-mail: [xphan@tju.edu.cn](mailto:xphan@tju.edu.cn)

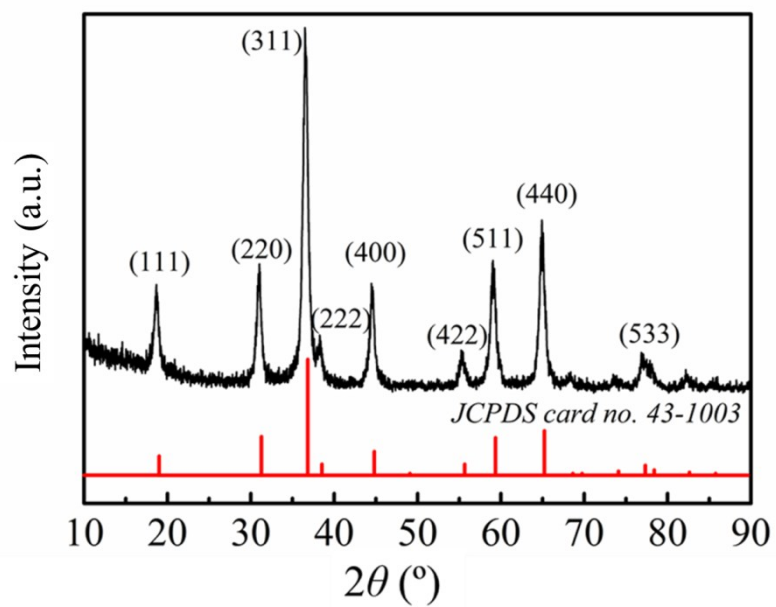

**Fig. S1** XRD patterns of Co<sub>3</sub>O<sub>4</sub> nanoparticle (black line) and standard PDF card of Co<sub>3</sub>O<sub>4</sub> phase (red line).

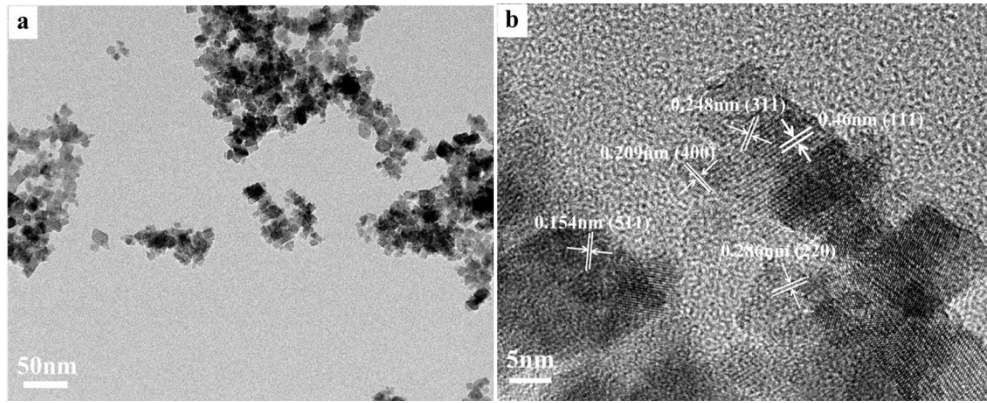

**Fig. S2** TEM and HRTEM images of  $\text{Co}_3\text{O}_4$  nanoparticle.

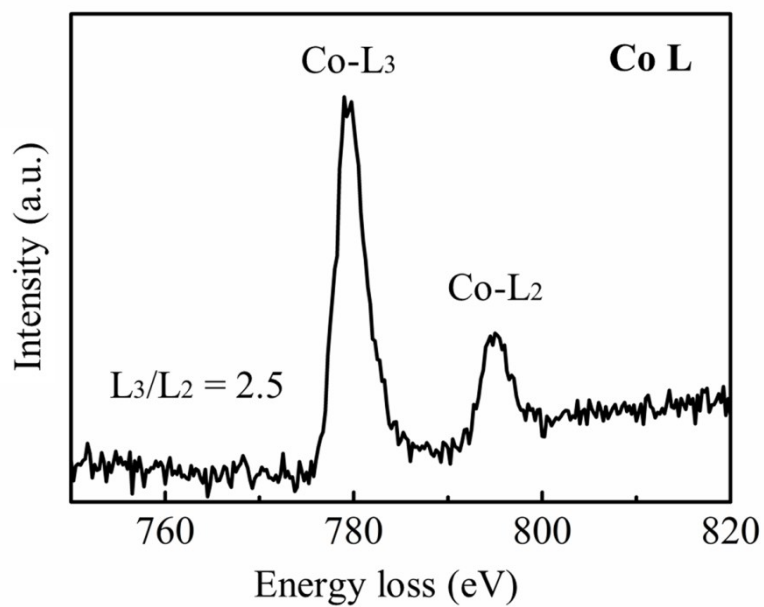

**Fig. S3** Co  $L_{2,3}$ -edges electron energy loss spectrum of  $\text{Co}_3\text{O}_4$  nanofilm.

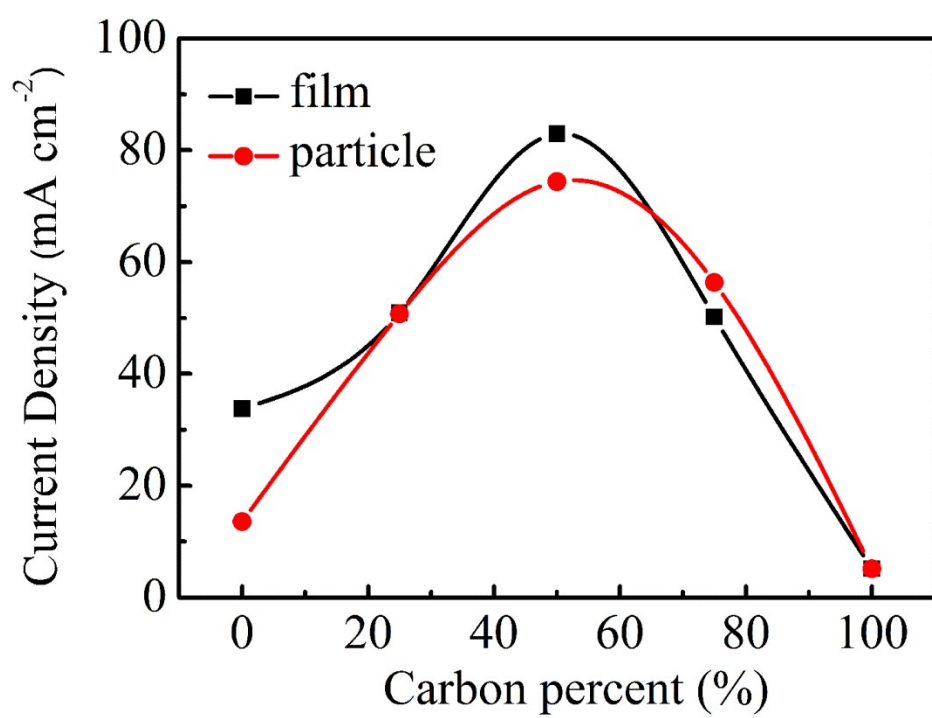

**Fig. S4** The OER current density with different carbon proportion (0%, 25%, 50%, 75%, 100%) on glass carbon electrode at 1.87 V vs RHE.

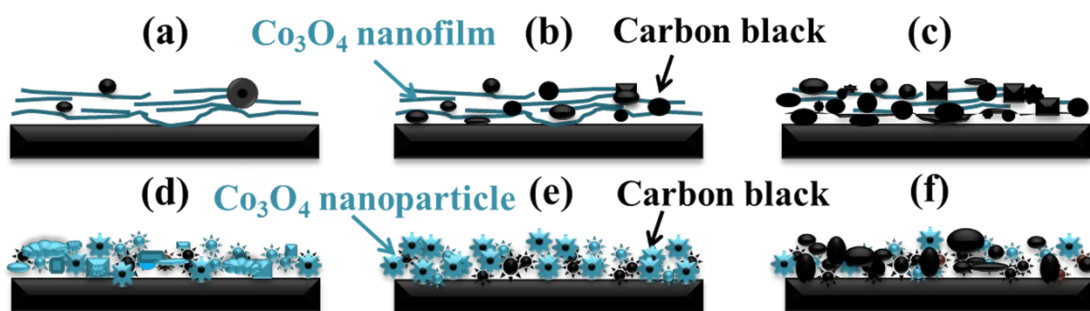

**Fig. S5** The schematic diagrams (a, b and c) of  $\text{Co}_3\text{O}_4$  nanofilm and (d, e and f) of  $\text{Co}_3\text{O}_4$  nanoparticle with different amount of carbon additive. Lower percentage carbon added (a, d), moderate percentage carbon added (b, e), higher percentage carbon added (c, f). The blue area is nanofilm and the black represents conductive agent carbon particles.

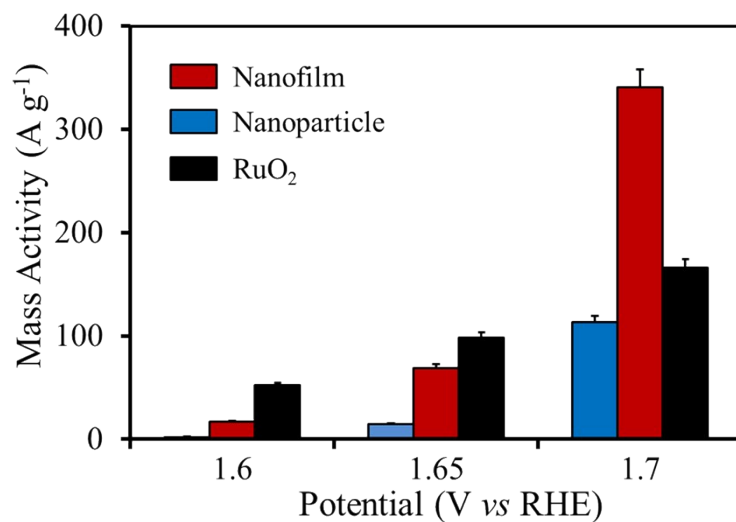

**Fig. S6** Mass activity of corresponding samples at various potentials.

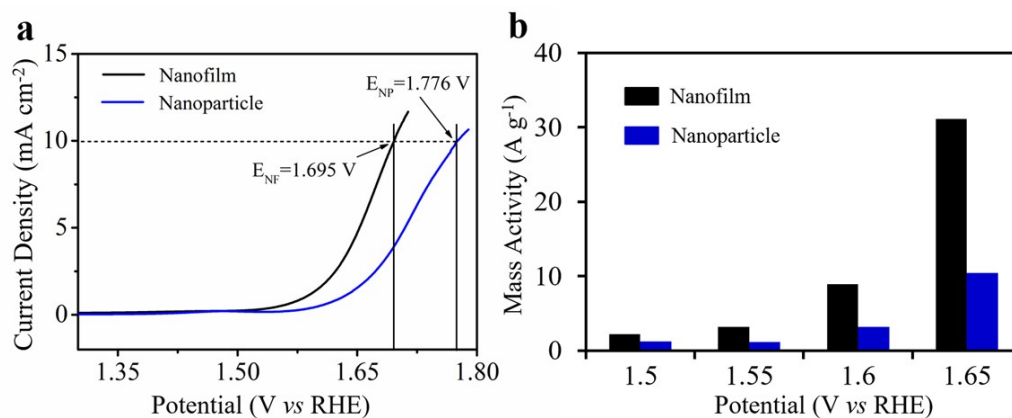

**Fig. S7** (a) LSV polarization curves of Co<sub>3</sub>O<sub>4</sub> nanofilm and nanoparticle loaded on GC measured in N<sub>2</sub>-saturated 0.1 M KOH solution at a scan rate of 5 mV s<sup>-1</sup> after iR correction. Catalyst loading was about 0.15 mg cm<sup>-2</sup>. (b) Mass activity of corresponding samples at various potentials.

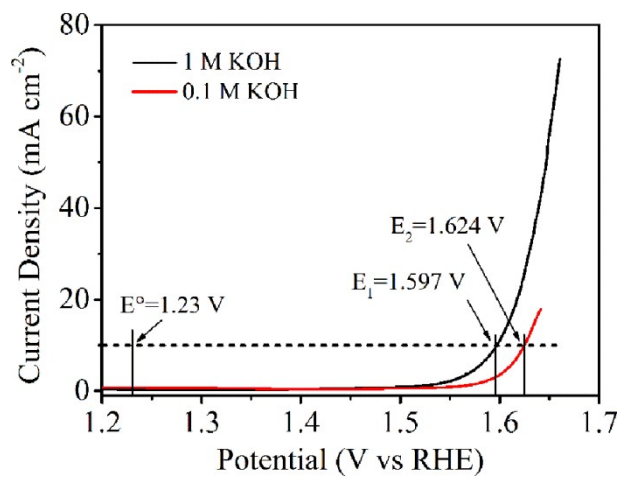

**Fig. S8** (a) LSV polarization curves of Co<sub>3</sub>O<sub>4</sub> nanofilm loaded on carbon fiber paper measured in N<sub>2</sub>-saturated 1.0 M and 0.1 M KOH solution at a scan rate of 5 mV s<sup>-1</sup> after iR correction. Catalyst loading is about 0.15 mg cm<sup>-2</sup>.



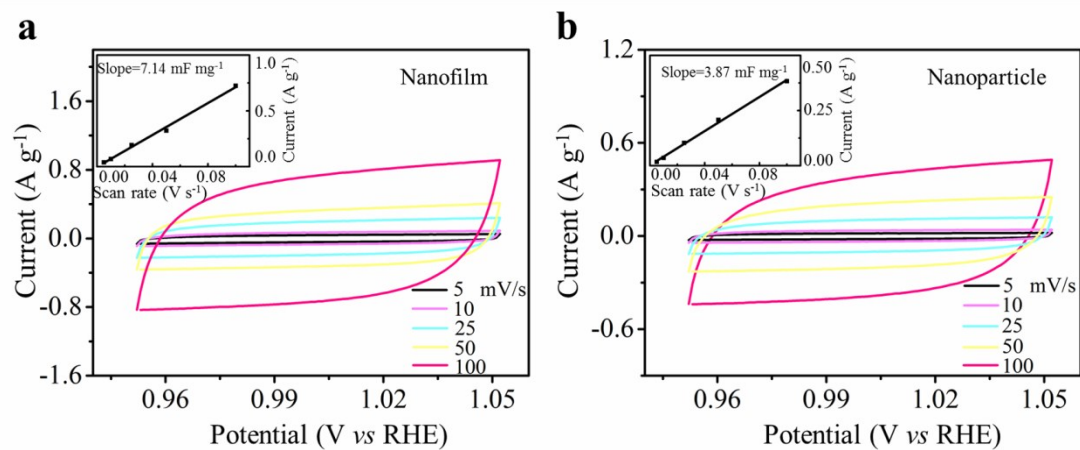

**Fig. S9** Cycle voltammograms of (a)  $\text{Co}_3\text{O}_4$  nanofilm and (b)  $\text{Co}_3\text{O}_4$  nanoparticle from 0.95 to 1.05 V vs RHE at different scan rates in 0.1 M KOH and inset shows the corresponding linear fitting of the capacitive density versus scan rates.

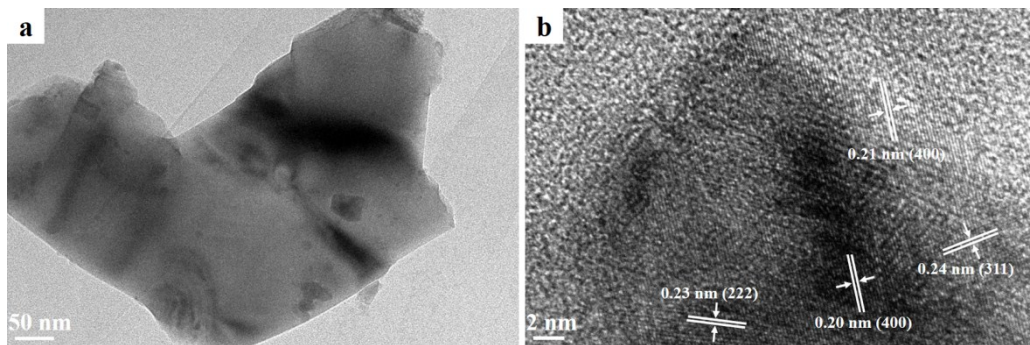

**Fig. S10** TEM images of ultrathin  $\text{Co}_3\text{O}_4$  nanofilm after long-time electrochemical stability test.

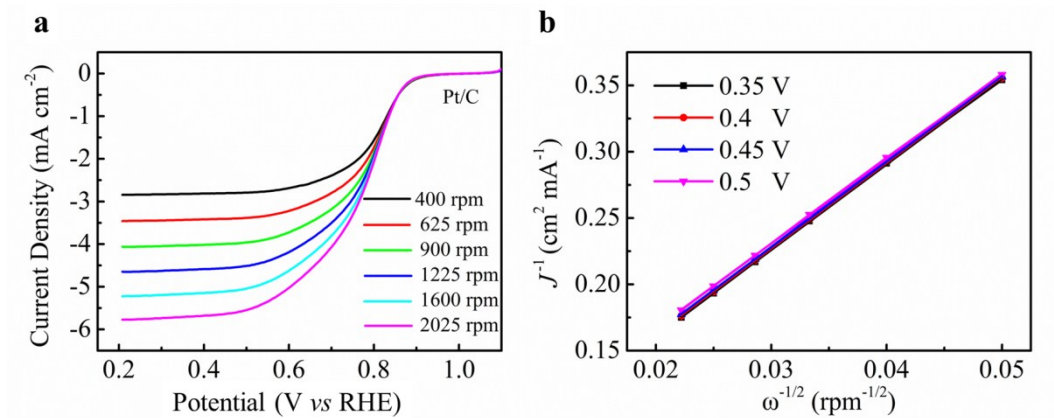

**Fig. S11** (a) Rotating-disk voltammograms of Pt/C in O<sub>2</sub>-saturated 0.1M KOH with a sweep rate of 5mV s<sup>-1</sup> at various rotation rates. (b) K-L plots at different potentials.

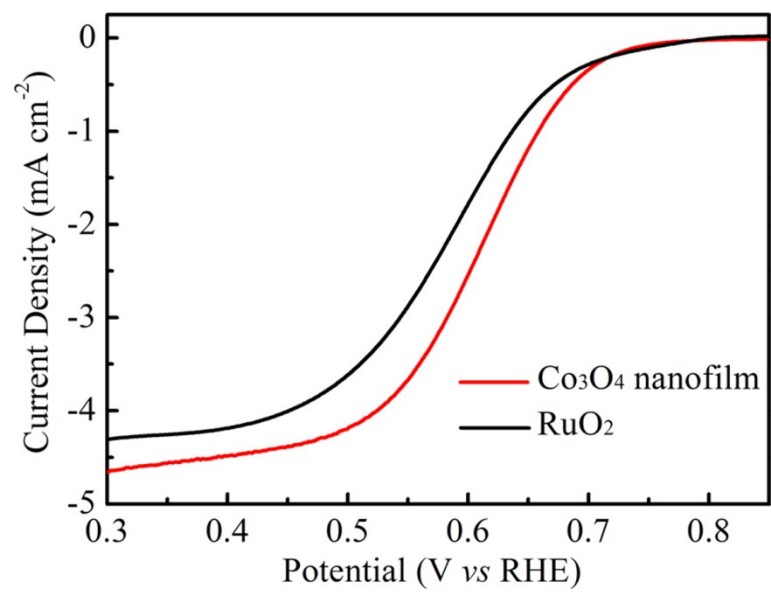

**Fig. S12** (a) ORR activity of Co<sub>3</sub>O<sub>4</sub> nanofilm and RuO<sub>2</sub> catalyst at 1600 rpm.

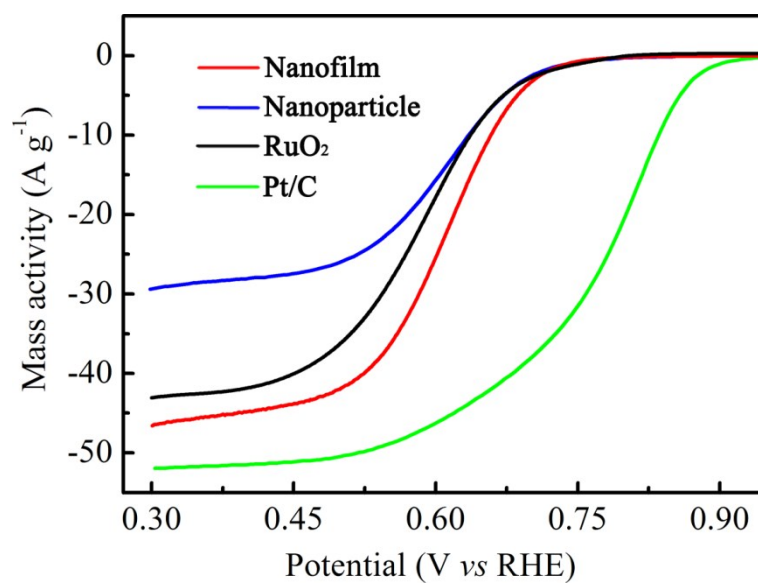

**Fig. S13** Mass activities of  $\text{Co}_3\text{O}_4$  nanofilm,  $\text{Co}_3\text{O}_4$  nanoparticles, commercial  $\text{RuO}_2$  and Pt/C catalyst on RDE at 1600 rpm in  $\text{O}_2$ -saturated 0.1 M KOH electrolyte. The loading is  $0.1 \text{ mg cm}^{-2}$  for all samples.

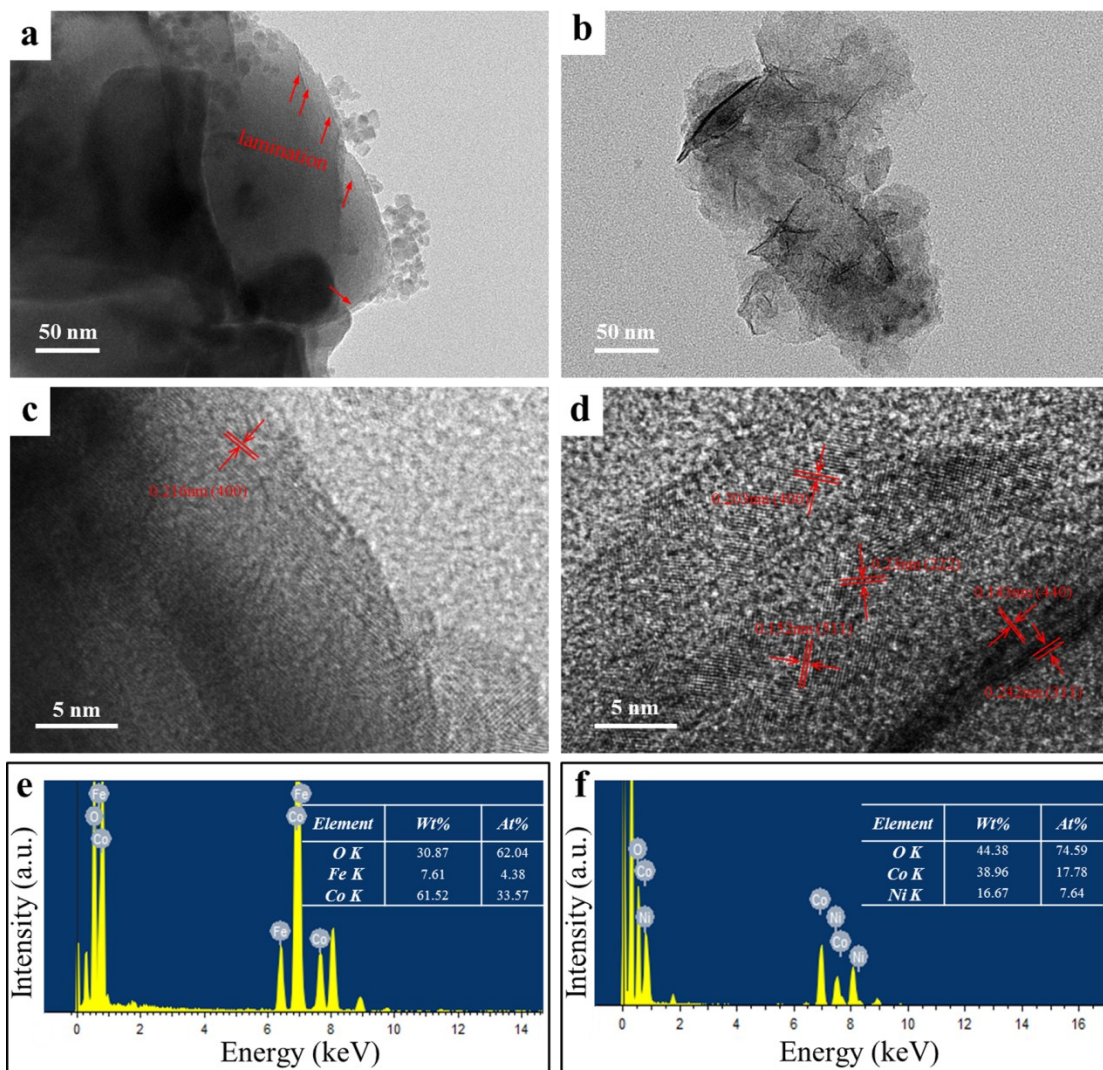

**Fig. S14** (a, b) Low magnification, (c, d) high magnification TEM images and (e, f) EDS spectra of  $\text{Fe}_x\text{Co}_{3-x}\text{O}_4$  (a, c, e) and  $\text{Ni}_x\text{Co}_{3-x}\text{O}_4$  (b, d, f) nanosheet, respectively.

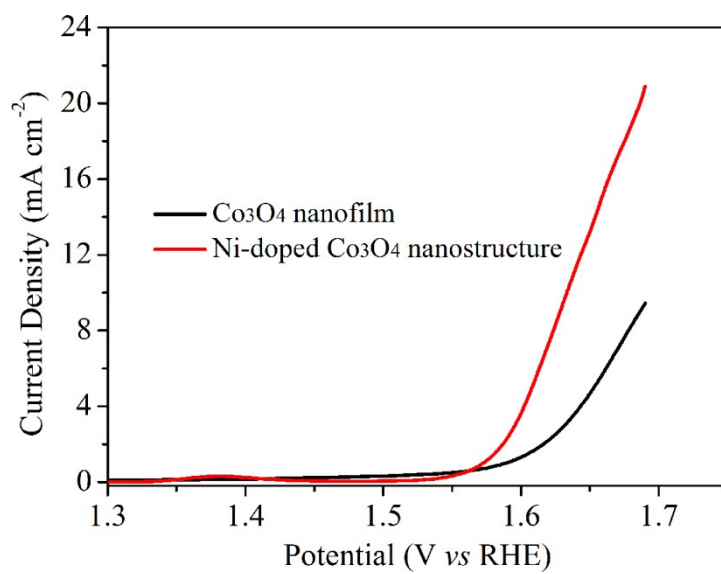

**Fig. S15** OER performance of Co<sub>3</sub>O<sub>4</sub> nanofilm and Ni-doped Co<sub>3</sub>O<sub>4</sub> nanostructure in 0.1 M KOH solution.

**Table S1.** The analysis of the Co 2p and O 1s XPS spectra.

| Catalyst                                       | Co<br>2p <sub>3/2</sub><br>(eV) | Co <sup>3+</sup><br>peak and<br>Area (%) | Co <sup>2+</sup><br>peak and<br>Area (%) | Co <sup>3+</sup> /<br>Co <sup>2+</sup> | O <sub>lat</sub><br>position<br>(eV) and<br>Area (%) | O <sub>ads</sub><br>position<br>(eV) and<br>Area (%) | O <sub>ads</sub><br>/O <sub>lat</sub> |
|------------------------------------------------|---------------------------------|------------------------------------------|------------------------------------------|----------------------------------------|------------------------------------------------------|------------------------------------------------------|---------------------------------------|
| Co <sub>3</sub> O <sub>4</sub><br>nanofilm     | 780.0                           | 779.88<br>67.2                           | 781.41<br>32.8                           | 2.05                                   | 529.65<br>41.05                                      | 531.31<br>58.95                                      | 1.4<br>4                              |
| Co <sub>3</sub> O <sub>4</sub><br>nanoparticle | 780.2                           | 779.75<br>64.6                           | 781.25<br>35.4                           | 1.82                                   | 529.64<br>47.94                                      | 530.77<br>52.06                                      | 1.0<br>8                              |



**Table S2.** The electrocatalytic activities of recently reported catalysts for OER in 0.1 M KOH.

| Catalyst                                                                                             | Potential at 10 mA cm <sup>-2</sup> (mV) | Electrolyte | Support | Mass activity (A g <sup>-1</sup> ) at 1.65 V | References |
|------------------------------------------------------------------------------------------------------|------------------------------------------|-------------|---------|----------------------------------------------|------------|
| Co <sub>3</sub> O <sub>4</sub> nanofilm                                                              | 1.62                                     | 0.1 M KOH   | CFP     | 137.5                                        | this work  |
| Co <sub>3</sub> O <sub>4</sub> nanofilm                                                              | 1.65                                     | 1.0 M KOH   | GC      | 68.9                                         | this work  |
| Co <sub>3</sub> O <sub>4</sub> /Co <sub>2</sub> MnO <sub>4</sub> nanocomposite                       | 1.77                                     | 0.1 M KOH   | GC      | ~22                                          | S1         |
| NiCo@NCNTs                                                                                           | 1.64                                     | 0.1 M KOH   | GC      | ~24                                          | S2         |
| CoO@Co/N-rGO                                                                                         | 1.65                                     | 0.1 M KOH   | GC      | ~51                                          | S3         |
| Zn-Co-S NS/CFP                                                                                       | 1.62                                     | 1.0 M KOH   | CFP     | ~107                                         | S4         |
| Mn <sub>3</sub> O <sub>4</sub> @CoMn <sub>2</sub> O <sub>4</sub> -Co <sub>x</sub> O <sub>y</sub> NPs | 1.68                                     | 0.1 M KOH   | GC      | ~32                                          | S5         |
| Co-P film                                                                                            | 1.57                                     | 1.0 M KOH   | CFP     | ~46                                          | S6         |
| Co <sub>3</sub> O <sub>4</sub> @C-MWCNT (20 wt%)                                                     | 1.61                                     | 1.0 M KOH   | GC      | ~55                                          | S7         |
| Ni <sub>x</sub> Co <sub>3-x</sub> O <sub>4</sub> nanowire                                            | 1.6                                      | 1.0 M KOH   | Ti foil | N.A.                                         | S8         |
| La(Co <sub>0.71</sub> Ni <sub>0.25</sub> ) <sub>0.96</sub> O <sub>3-δ</sub>                          | 1.55                                     | 0.1 M KOH   | GC      | ~42                                          | S9         |
| LaNi <sub>0.99</sub> O <sub>3-δ</sub>                                                                | 1.60                                     | 0.1 M KOH   | GC      | ~19.5                                        | S9         |
| Ni <sub>0.33</sub> Co <sub>0.67</sub> S <sub>2</sub> nanowires                                       | 1.6                                      | 1.0 M KOH   | Ti foam | ~100                                         | S10        |
| 1D-Co <sub>3</sub> V <sub>2</sub> O <sub>8</sub>                                                     | 1.58                                     | 0.1 M KOH   | GC      | N.A.                                         | S11        |
| Co <sub>3</sub> O <sub>4</sub>                                                                       | 1.67                                     | 0.1 M KOH   | GC      | ~23.8                                        | S11        |

## References

- S1. D. Wang, X. Chen, D. G. Evans and W. Yang, *Nanoscale*, 2013, **5**, 5312-5315.
- S2. J. Yu, Y. Zhong, W. Zhou and Z. Shao, *J. Power Sources*, 2017, **338**, 26-33.
- S3. X. Liu, J. Zang, L. Chen, L. Chen, X. Chen, P. Wu, S. Zhou and Y. Wang, *J. Mater. Chem. A*, 2017, **5**, 5865-5872.
- S4. X. Wu, X. Han, X. Ma, W. Zhang, Y. Deng, C. Zhong and W. Hu, *ACS Appl. Mater. Interfaces*, 2017, DOI: 10.1021/acsami.6b16602.
- S5. Z. Luo, E. Irtem, M. Ibáñez, R. Nafria, S. Martí-Sánchez, A. Genç, M. de la Mata, Y. Liu, D. Cadavid and J. Llorca, *ACS Appl. Mater. Interfaces*, 2016, **8**, 17435-17444.
- S7. N. Jiang, B. You, M. Sheng and Y. Sun, *Angew. Chem., Int. Ed.*, 2015, **127**, 6349-6352.
- S6. X. Li, Y. Fang, X. Lin, M. Tian, X. An, Y. Fu, R. Li, J. Jin and J. Ma, *J. Mater. Chem. A*, 2015, **3**, 17392-17402.
- S8. Y. Li, P. Hasin and Y. Wu, *Adv. Mater.*, 2010, **22**, 1926-1929.
- S9. A. Vignesh, M. Prabu and S. Shanmugam, *ACS Appl. Mater. Interfaces*, 2016, **8**, 6019-6031.
- S10. Z. Peng, D. Jia, A. M. Al-Enizi, A. A. Elzatahry and G. Zheng, *Adv. Energy Mater.*, 2015, **5**, 1402031.
- S11. S. Hyun, V. Ahilan, H. Kim and S. Shanmugam, *Electrochem. Commun.*, 2016, **63**, 44-47.
